# Supplementary material for: Glioma cells are resistant to inflammation-induced alterations of mitochondrial dynamics
Source: PubMed Central journal article supplement — Int J Oncol. 2020 Oct 15;57(6):1293–306. doi: 10.3892/ijo.2020.5134 (PMC7646598; doi:10.3892/ijo.2020.5134), 2020-10-15
Supplement: Supplementary_Data.pdf [file Supplementary_Data.pdf]

Figure S1. Proinflammatory stimuli induce the secretion of IL-6 in glioma cells. Statistical analyses of the secretion of IL-6 in (A) U87-MG cells (n=3) and (B) U118-MG cells (n=4) at different time points after LPS and IFN- $\gamma$  stimulation. \*P<0.05; \*\*P<0.01; \*\*\*P<0.001 vs. 0 h.

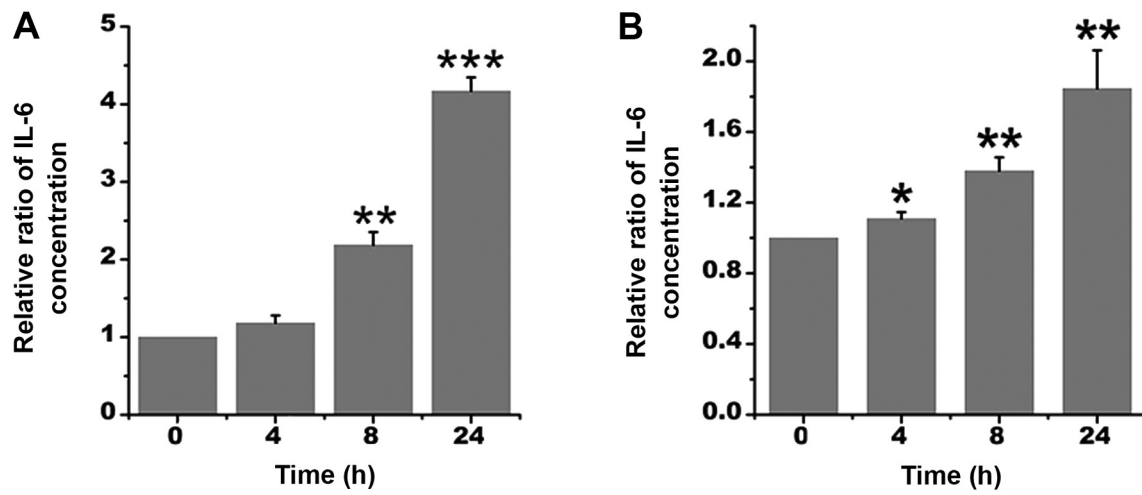

Figure S2. Proinflammatory stimuli induce mitochondrial network remodeling in glioma cells. (A) Representative images of mitochondria in U118-MG cells at (a) 0, (b) 4, (c) 8 and (d) 24 h after LPS+IFN- $\gamma$  stimulation. Mitotracker Red served as the mitochondrial probe. Statistical analyses of the ratios of U118-MG cells with (e) fragmented mitochondria (n=4; 50-150 cells per time point) and (f) enlarged mitochondria (n=4; 50-150 cells per time point). (g) Representative transmission electron microscopy images of mitochondria in U118-MG cells after LPS and IFN- $\gamma$  treatment (scale bar, 2  $\mu$ m). The boxed area was enlarged in (h). Scale bar, 500 nm. (B)  $\Delta\Psi_m$  of U118-MG was analyzed via flow cytometry. The histogram shows the statistical analysis of the  $\Delta\Psi_m$  after LPS and IFN- $\gamma$  treatment (n=3). The statistical significance was evaluated via one-way ANOVA followed by Tukey's post hoc test. \*P<0.05; \*\*P<0.01; \*\*\*P<0.001. LPS, lipopolysaccharide;  $\Delta\Psi_m$ , mitochondrial membrane potential, fluor, fluorescence.

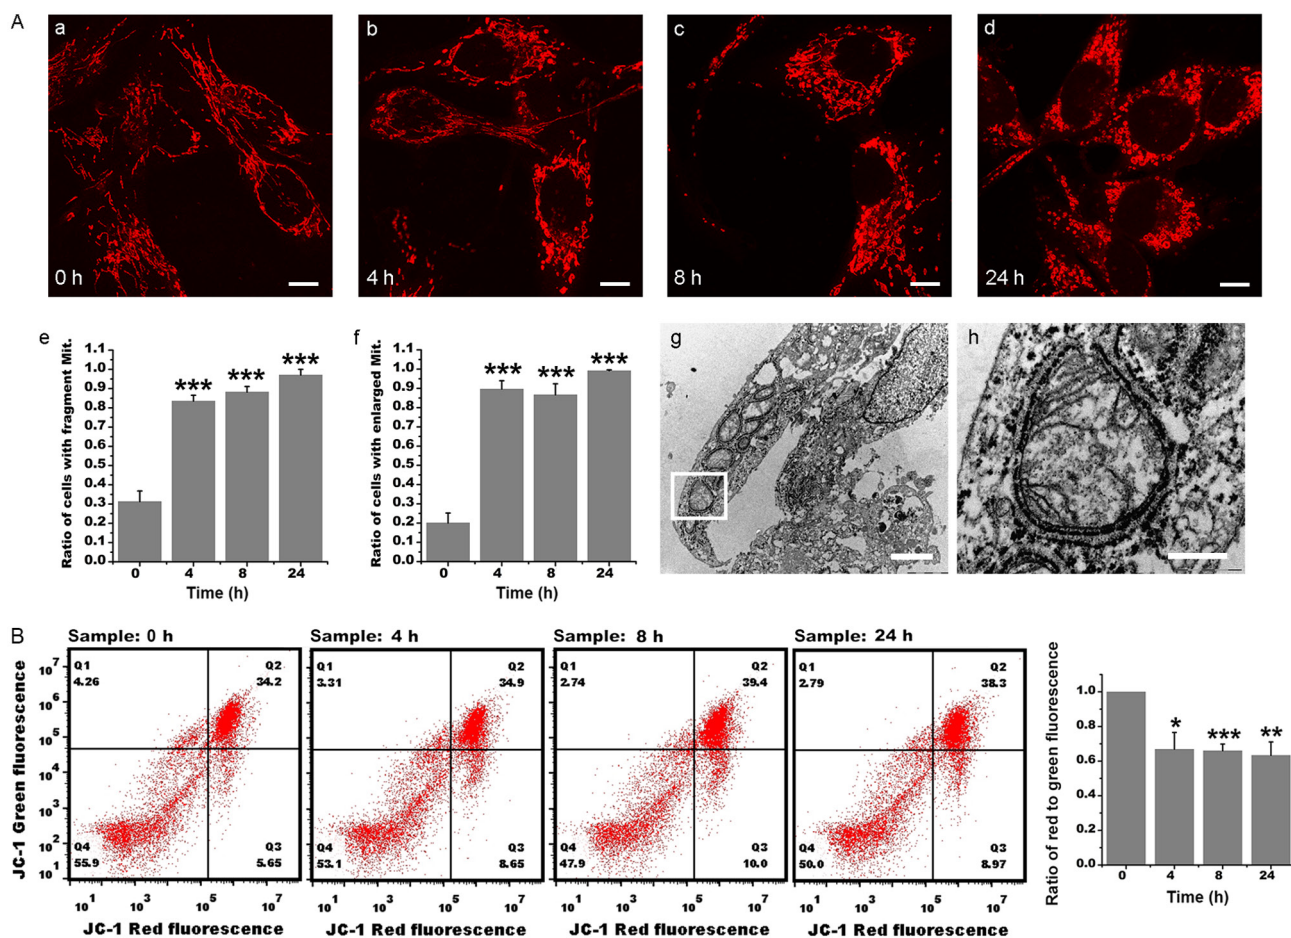

Figure S3. There was no oxidative damage of the mitochondrial membrane after the stimulation with LPS and IFN- $\gamma$  in U118-MG cells. Mitotracker Red was used to label the mitochondria, and HNE was used to label the lipid peroxidation. Scale bar, 10  $\mu$ m. LPS, lipopolysaccharide; HNE, 4-hydroxynonenal.

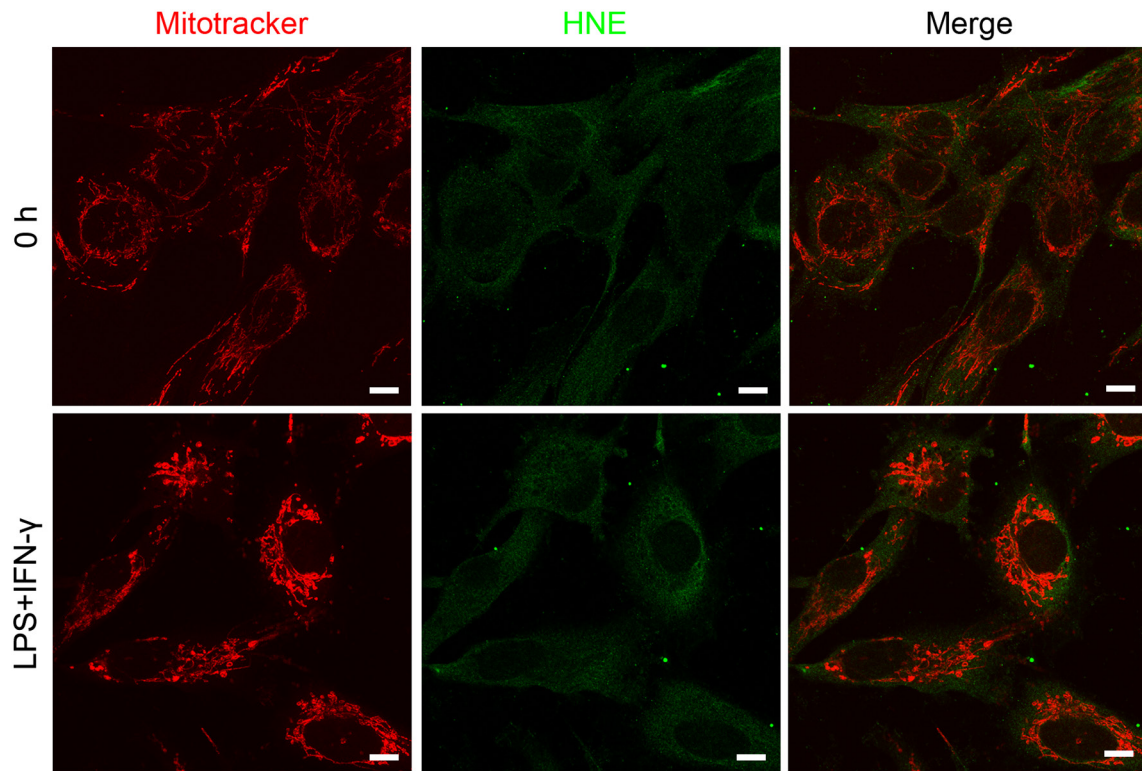

Figure S4. Dysfunctional mitochondria are not cleared via mitophagy. (A) U87-MG cells were transfected with the GFP-LC3 plasmid and then treated with LPS and IFN- $\gamma$ . Scale bar, 10  $\mu$ m. (B) Immunocytochemistry of the lysosomes using the lysosome marker LAMP1 in U87-MG cells before (0 h) and after LPS and IFN- $\gamma$  treatment. Scale bar, 5  $\mu$ m. LPS, lipopolysaccharide; LAMP1, lysosomal associated membrane protein 1.

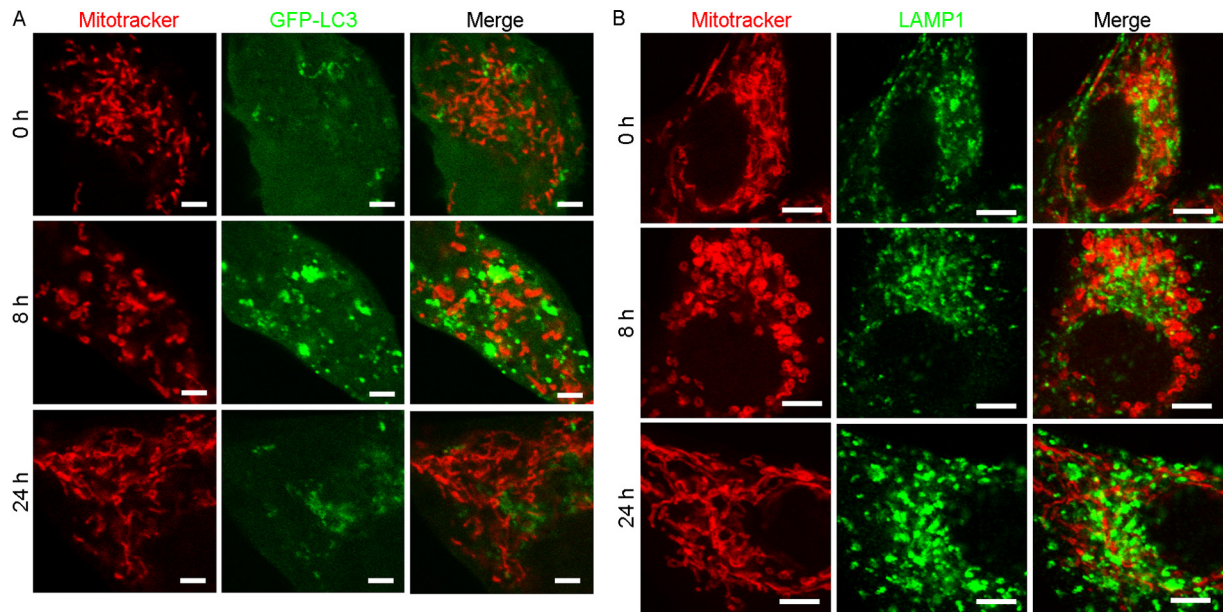

Table SI. Demographic parameters of patients with glioma.

| Patient number | Histology                    | Grade | Sex | Age, years |
|----------------|------------------------------|-------|-----|------------|
| 1              | Astrocytoma                  | II    | M   | 56         |
| 2              | Astrocytoma                  | II    | F   | 38         |
| 3              | Astrocytoma                  | II    | F   | 40         |
| 4              | Astrocytoma                  | II    | F   | 45         |
| 5              | Astrocytoma                  | II    | M   | 43         |
| 6              | Astrocytoma                  | II    | F   | 52         |
| 7              | Astrocytoma                  | II    | M   | 57         |
| 8              | Oligoastrocytoma             | II    | F   | 42         |
| 9              | Oligoastrocytoma             | II    | F   | 52         |
| 10             | Anaplastic astrocytoma       | III   | F   | 39         |
| 11             | Anaplastic astrocytoma       | III   | M   | 74         |
| 12             | Anaplastic astrocytoma       | III   | M   | 39         |
| 13             | Anaplastic astrocytoma       | III   | F   | 64         |
| 14             | Anaplastic astrocytoma       | III   | F   | 59         |
| 15             | Anaplastic astrocytoma       | III   | M   | 47         |
| 16             | Anaplastic astrocytoma       | III   | F   | 64         |
| 17             | Anaplastic astrocytoma       | III   | M   | 47         |
| 18             | Anaplastic oligoastrocytoma  | III   | M   | 57         |
| 19             | Anaplastic oligodendroglioma | III   | F   | 59         |
| 20             | Glioblastoma                 | IV    | M   | 36         |
| 21             | Glioblastoma                 | IV    | F   | 57         |
| 22             | Glioblastoma                 | IV    | M   | 42         |
| 23             | Glioblastoma                 | IV    | M   | 50         |
| 24             | Glioblastoma                 | IV    | M   | 49         |
| 25             | Glioblastoma                 | IV    | M   | 66         |

M, male; F, female.
